# Supplementary material for: SYBR Green I promotes melamine binding to poly-thymine DNA and FRET-based ratiometric sensing
Source: Royal Society of Chemistry journal article supplement (doi:10.1039/d1an00102g), 2021-01-01
Supplement: d1an00102g1.pdf [file d1an00102g1.pdf]

**Electronic supplementary information**

**SYBR Green I promotes melamine binding to polythymine DNA and FRET-based ratiometric sensing**

Fan He<sup>a,b</sup>, Yudong Shen<sup>a\*</sup> and Juewen Liu<sup>b\*</sup>

<sup>a</sup> College of Food Science, Guangdong Provincial Key Laboratory of Food Quality and Safety, South China Agricultural University, Guangzhou 510642, Guangdong, P. R. China;

<sup>b</sup> Department of Chemistry, Waterloo Institute for Nanotechnology, University of Waterloo, Waterloo, Ontario N2L 3G1, Canada.

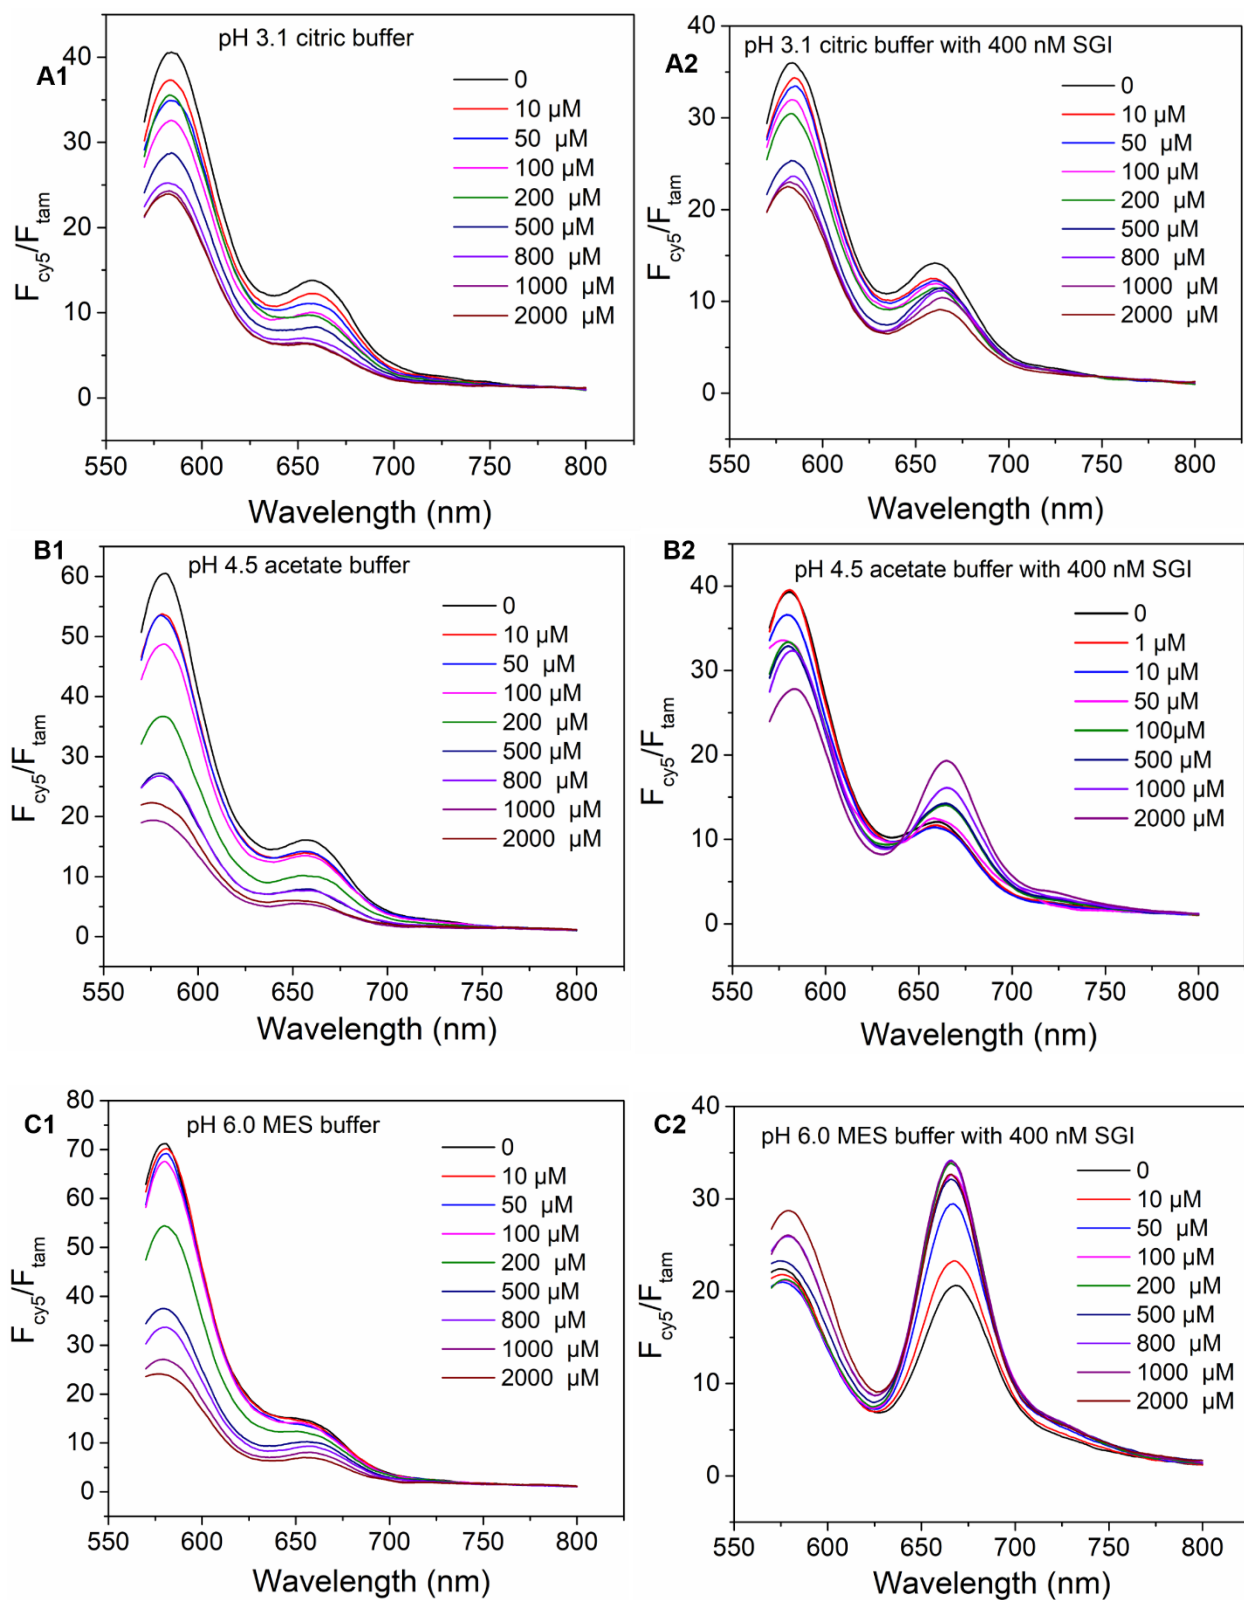

**Figure S1.** The fluorescence intensity signal change (A1, B1, C1), and the peak ratio  $F_{\text{cy5}}/F_{\text{tam}}$  (A2,B2,C2) of melamine titration into cy5-T<sub>30</sub>-tam DNA in different pH buffers. All of the buffers were 10 mM with or without 400 nM SGI. The concentration of T<sub>30</sub> was 20 nM.
